# Supplementary material for: Regional differences in the care and outcomes of acute stroke patients in Australia: an observational study using evidence from the Australian Stroke Clinical Registry (AuSCR)
Source: HighWire-hosted journal article supplement (doi:10.1136/bmjopen-2020-040418), 2021-04-01
Supplement: bmjopen-2020-040418supp001_data_supplement.pdf [file bmjopen-2020-040418supp001_data_supplement.pdf]

### Online Supplement 1 - Co-investigators and other contributors to the Australian Stroke Clinical Registry

The following people are acknowledged for their contribution to collecting hospital data on the patients registered in AuSCR or their participation on various governance committees between 2010 and 2015:

#### Steering and Management Committee

**Craig Anderson** PhD (Royal Prince Alfred Hospital NSW, site investigator, The George Institute for Global Health University of New South Wales NSW, The George Institute for Global Health at Peking University Health Science Center China); **Dominique Cadilhac** PhD (Stroke and Ageing Research, School of Clinical Sciences at Monash Health, Monash University VIC, Stroke Division, The Florey Institute of Neuroscience and Mental Health VIC, Data Custodian); **Geoffrey Donnan** MD (Stroke Division, The Florey Institute of Neuroscience and Mental Health VIC); **Rohan Grimley** MBBS (Gympie Hospital QLD, Nambour General Hospital QLD, site investigator, Sunshine Coast Clinical School, University of Queensland QLD); **Peter Hand** MBBS, MD, FRACP (Royal Melbourne Hospital VIC, site investigator)

#### Steering Committee

**Julie Bernhardt** PhD (The Florey Institute of Neuroscience and Mental Health VIC); **Paul Bew** MPhy (The Prince Charles Hospital QLD); **Christopher Bladin** MD, MBBS, FRACP (Box Hill Hospital VIC, site investigator); **Greg Cadigan** BN (Queensland State-wide Stroke Clinical Network QLD); **Helen Castley** MBBS (Royal Hobart Hospital Tasmania, site investigator); **Andrew Evans** MBBS (Hons), FRACP (Westmead Hospital NSW); **Susan Hillier** PhD (University of South Australia, SA); **Erin Lalor** PhD (Stroke Foundation VIC); **Andrew Lee** MBBS FRACP (Flinders Medical Centre, South Australia); **Richard Lindley** PhD (The George Institute for Global Health NSW); **Mark Mackay** MBBS, FRACP (Royal Children's Hospital VIC, site investigator); **Sandra Martyn** (Health Statistics Centre Queensland Health QLD); **John McNeil** PhD (Monash University VIC); **Sandy Middleton** PhD (Nursing Research Institute, St Vincent's Health Australia NSW, Australian Catholic University NSW); **Michael Pollack** MBBS, FAFRM (RACP), FACRM, FFPM (ANZCA), MMedSci (Clin Epi) (Hunter Stroke Service NSW); **Mark Simcocks** BSc (VIC, Consumer Representative); **Frances Simmonds** MSc(Med), (Australasian Rehabilitation Outcomes Centre NSW); **Amanda Thrift** PhD (Stroke and Ageing Research, School of Clinical Sciences at Monash Health, Monash University VIC); **Andrew Wesseldine** MBBS, FRACP (St John of God Healthcare; Department of Health WA)

#### Management Committee

**Helen Dewey** PhD (Austin Hospital VIC, Box Hill Hospital VIC, site investigator, Eastern Health Clinical School, Monash University VIC); **Steven Faux** FAFRM (RACP) (St Vincent's Health Australia NSW); **Kelvin Hill** BAppSci (Stroke Foundation VIC); **Natasha Lannin** PhD (Faculty of Health Sciences, La Trobe University VIC, Occupational Therapy Department, Alfred Health VIC); **Christopher Levi** PhD (Acute Stroke Services, John Hunter Hospital NSW, site investigator); **Christopher Price** BSocW BSc (National Stroke Foundation)

## Site Investigators

**Lauren Arthurson** BSpPath, MHLthServMt (Echuca Regional Health VIC); **Pradeep Bambery** MD, FRCP(G), FRACP (Bundaberg Hospital QLD); **Tim Bates** MBBS, FRACP (Swan District Hospital WA); **Carolyn Beltrame** RN (Div1) (Latrobe Regional Hospital VIC); **David Blacker** MBBS, FRACP (Sir Charles Gairdner Hospital WA); **Ernie Butler** MBBS FRACP (Peninsula Health VIC); **Sean Butler** FIMLS, BM Hons, MRCP(UK), FRACP (Prince Charles Hospital QLD); **Chris Charnley** MBBS (Warrnambool Base Hospital VIC); **Jo Cotterell** BPhysio (Mildura Base Hospital VIC); **Douglas Crompton** MA, PhD, MBBS, FRACP (Northern Hospital VIC); **Vanessa Crosby** Dip Physio (Albury-Wodonga Health VIC); **Carolyn De Wytt** MRCP (UK), MB BCH DUBL, FRACP (Greenslopes Private Hospital QLD); **David Douglas** MBBS, M Admin, FRACGP, FAFRM (RACP) (Ipswich Hospital QLD); **Martin Dunlop** MBBS, FACRM (Cairns Base Hospital QLD); **Paula Easton** BPhy (Hons) (Mackay Hospital QLD); **Sharan Ermel** RN (Div1) (Bendigo Health VIC); **Nisal Gange** MBBS, AMC CERT (Toowoomba Hospital QLD); **Richard Geraghty** MBBS, FRACP (Redcliffe Hospital QLD); **Melissa Gill** BAppSc (SpPath) (Armidale Hospital, NSW); **Graham Hall** MBBS, FRACP (Princess Alexandra Hospital QLD); **Geoffrey Herkes** MBBS, PhD, FRACP (Royal North Shore Hospital NSW); **Karen Hines** BHIM (Caboolture Hospital QLD); **Francis Hishon** RN (Redland Hospital QLD); **James Hughes** BMed, FRACP (Tamworth Hospital NSW); **Joel Iedema** MBBS, FRACP (Redland Hospital QLD); **Martin Jude** MBBS, FRACP (Wagga Wagga Hospital NSW); **Thomas Kraemer** Approbation als Arzt, STATE EXAM MED MUNSTER, FRACP (Ballarat Health Services VIC); **Paul Laird** MBBS, FRACP (Rockhampton Hospital QLD); **Johanna Madden** BPhysio (Goulburn Valley Health VIC); **Graham Mahaffey** RN (Hervey Bay Hospital QLD); **Suzana Milosevic** MD, FRACP, AMC CERT (Logan Hospital QLD); **Peter O'Brien** MBBS, DIP RANZCOG, FRACMA, FACRRM (Warrnambool Hospital VIC); **Trisha Oxley** RN/RM, MANP (Critical Care) (Swan Hill District Health VIC); **Michaela Plante** RN (Div 1) (Rockhampton Hospital QLD); **Juan Rois-Gnecco** Medico Cirujano Javeriana, FAFRM (Ipswich Hospital QLD); **Stephen Read** MBBS, PhD, FRACP (Royal Brisbane and Women's Hospital QLD); **Kristen Rowe** BNurs, Cert NeuroSci Nurs (Austin Health VIC); **Fiona Ryan** BAppSc (SpPath), MHLthSc (Orange Hospital and Bathurst Hospitals NSW); **Arman Sabet** MD, FRACP, BSc (Gold Coast Hospital and Robina Hospital QLD); **Noel Saines** MBBS, FRACP (The Wesley Hospital QLD); **Eva Salud** MD, AMC CERT (Gympie Hospital QLD); **Amanda Siller** MBBS, FRACP (Queen Elizabeth II Jubilee Hospital QLD); **Christopher Staples** MD (Mater Adults QLD); **Amanda Styles** RN (Div 1) (Armidale Hospital NSW); **Judith Walloscheck** MBA (Bendigo Health VIC); **Richard White** MD, FRCP, FRACP. (Townsville Hospital QLD); **Andrew Wong** MBBS, PhD (Royal Brisbane and Women's Hospital QLD); **Lillian Wong** MBBS FRACP (Logan Hospital QLD)

## Staff at The Florey Institute of Neuroscience and Mental Health VIC

Robin Armstrong, Leonid Churilov, Alison Dias, Kelly Drennan, Adele Gibbs, Brenda Grabsch, Jen Holland, Monique Kilkenny, Joosup Kim, Charlotte Krenus, Francis Kung, Joyce Lim, Karen Moss, Kate Paice, Enna Salama, Sam Shehata, Sabrina Small, Renee Stojanovic, Steven Street, Emma Tod, Kasey Wallis, Julia Watt

## Staff at Monash University VIC

Nadine Andrew
