# Supplementary material for: Regional differences in the care and outcomes of acute stroke patients in Australia: an observational study using evidence from the Australian Stroke Clinical Registry (AuSCR)
Source: HighWire-hosted journal article supplement (doi:10.1136/bmjopen-2020-040418), 2021-04-01
Supplement: bmjopen-2020-040418supp002_data_supplement.pdf [file bmjopen-2020-040418supp002_data_supplement.pdf]

**Online Supplement 2 – Queensland Specific Care Processes**

| <b>Care Process</b>                                   | <b>Urban <i>n</i> (%)</b> | <b>Rural <i>n</i> (%)</b> | <b>p-value</b> |
|-------------------------------------------------------|---------------------------|---------------------------|----------------|
| Mobilised during admission                            | 2,876 (69.3)              | 1,950 (80.1)              | <0.001         |
| Swallow screen or assessment                          | 4,952 (74.2)              | 3,676 (83.5)              | <0.001         |
| Aspirin within 48h, if ischaemic                      | 3,393 (68.2)              | 2,843 (75.8)              | <0.001         |
| Discharged on antithrombotic medication, if ischaemic | 3,823 (80.1)              | 2,694 (86.7)              | <0.001         |
